# Supplementary material for: Pairwise tagging framework for end-to-end emotion-cause pair extraction
Source: Springer Nature journal article supplement (doi:10.1007/s11704-022-1409-x), 2022-08-08
Supplement: 11704_2022_1409_MOESM1_ESM.pdf [file 11704_2022_1409_MOESM1_ESM.pdf]

# Pairwise Tagging Framework for End-to-end Emotion-cause Pair Extraction

**Zhen WU, Xinyu DAI, Rui XIA**

Frontiers of Computer Science, DOI: [10.1007/s11704-022-1409-x](https://doi.org/10.1007/s11704-022-1409-x)

# Problems & Ideas

- Problems of existing works:
  - Pipelined methods: easily suffer from error propagation.
  - Multi-task learning methods: cannot optimize all subtasks of ECPE globally and may lead to suboptimal extraction results.
- Ideas: A novel Pairwise Tagging Framework (PTF) that tackles the complete emotion-cause pair extraction in one unified tagging task.
  - PTF innovatively transforms all subtasks of ECPE, i.e., emotions extraction, causes extraction, and causal relations detection between emotions and causes, into one unified clause-pair tagging task.

| Tags | Meanings                                                                          |
|------|-----------------------------------------------------------------------------------|
| E    | the clause-pair $(c_i, c_i)$ expresses emotion, i.e., $c_i$ is an emotion clause. |
| C    | the clause-pair $(c_j, c_j)$ expresses cause, i.e., $c_j$ is a cause clause.      |
| P    | the clause-pair $(c_i, c_j)$ contains a casual relation.                          |
| O    | no above three relations for clause-pair $(c_i, c_j)$ .                           |

The meanings of PTF tags for the ECPE task.

| $c_1$ | $c_2$ | $c_3$ | $c_4$ | $c_5$ | $c_6$ |       |
|-------|-------|-------|-------|-------|-------|-------|
| O     | O     | O     | O     | O     | O     | $c_1$ |
|       | C     | O     | P     | O     | O     | $c_2$ |
|       |       | C     | P     | O     | O     | $c_3$ |
|       |       |       | E     | O     | O     | $c_4$ |
|       |       |       |       | E     | P     | $c_5$ |
|       |       |       |       |       | C     | $c_6$ |

PTF tagging example. There are three emotion-cause pairs  $(c_4, c_2)$ ,  $(c_4, c_3)$  and  $(c_5, c_6)$  in the document  $(c_1, \dots, c_6)$

# Main Contributions

- Contributions:
  - A novel tagging framework PTF that is the first work to solve all subtasks of ECPE with a global and unified clause-pair tagging task, instead of multi-task learning;
  - A PTF-based end-to-end neural network PTN that avoids error propagation and improves the performance of ECPE significantly;
  - PTN introduces three helpful mechanisms and achieves state-of-the-art performance on the ECPE benchmark dataset.

| Models        | Emotion Extraction |              |              | Cause Extraction |              |              | Emotion-Cause Pair Extraction |              |              |
|---------------|--------------------|--------------|--------------|------------------|--------------|--------------|-------------------------------|--------------|--------------|
|               | P                  | R            | F1           | P                | R            | F1           | P                             | R            | F1           |
| Indep         | 83.75              | 80.71        | 82.10        | 69.02            | 56.73        | 62.05        | 68.32                         | 50.82        | 58.18        |
| Inter-CE      | 84.94              | 81.22        | 83.00        | 68.09            | 56.34        | 61.51        | 69.02                         | 51.35        | 59.01        |
| Inter-EC      | 83.64              | 81.07        | 82.30        | 70.41            | 60.83        | 65.07        | 67.21                         | 57.05        | 61.28        |
| E2EECP        | <u>85.95</u>       | 79.15        | 82.38        | 70.62            | 60.30        | 65.03        | 64.78                         | 61.05        | 62.80        |
| ECPE-2D(base) | 85.37              | 81.97        | 83.54        | 71.51            | 62.74        | 66.76        | <u>71.73</u>                  | 57.54        | 63.66        |
| ECPE-2D       | 85.12              | 82.20        | 83.58        | <b>72.72</b>     | 62.98        | 67.38        | 69.60                         | 61.18        | 64.96        |
| TransECPE     | 80.80              | <b>84.39</b> | 82.56        | 67.42            | <u>65.34</u> | 66.36        | 65.15                         | <u>63.54</u> | 64.34        |
| RankCP(top-1) | 87.35              | 81.46        | 84.28        | 71.30            | 64.68        | 67.90        | 69.10                         | 62.54        | 65.62        |
| RankCP        | <b>87.03</b>       | <u>84.06</u> | <b>85.48</b> | 69.27            | <b>67.43</b> | <b>68.24</b> | 66.98                         | <b>65.46</b> | <u>66.10</u> |
| PTN(base)     | 84.12              | 81.61        | 82.82        | <u>72.02</u>     | 63.66        | 67.50        | 71.38                         | 59.48        | 64.80        |
| PTN           | 84.47              | 82.78        | <u>83.60</u> | 71.75            | 64.70        | <u>67.99</u> | <b>76.00</b>                  | 59.18        | <b>66.50</b> |

Best and second-best results are respectively in bold and underline. With the help of novel unified tagging framework PTF, the proposed end2end model PTN outperforms the pipelined methods such as Inter-CE, Inter-EC, and multi-task methods such as E2EECP, ECPE-2D, and RankCP.
